# Supplementary material for: Predicting prognosis using molecular profiling in estrogen receptor-positive breast cancer treated with tamoxifen
Source: PubMed Central journal article supplement (PMC2423197; doi:10.1186/1471-2164-9-239), 2008-05-22

# Hazard ratio (CI) wrt signature size 10FOLD CV

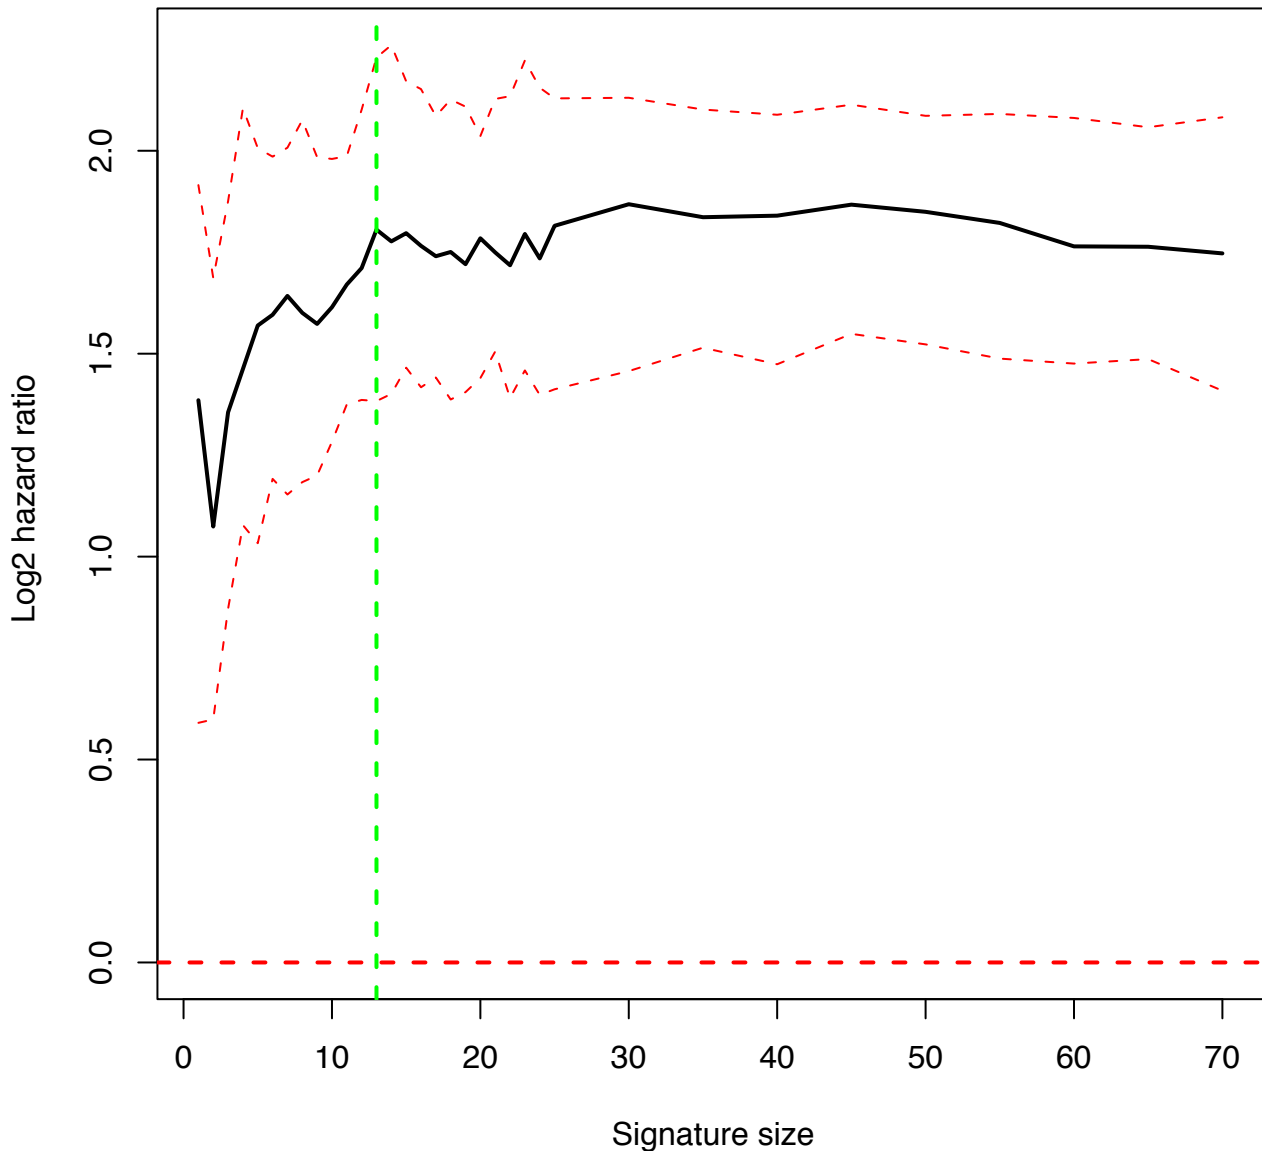

Supplement: 1471-2164-9-239-S6.pdf [file 1471-2164-9-239-S6.pdf]
