# Supplementary figures and images for: Predicting prognosis using molecular profiling in estrogen receptor-positive breast cancer treated with tamoxifen
Source: Springer Nature journal article supplement (doi:10.1186/1471-2164-9-239), 2008-05-22

**A**

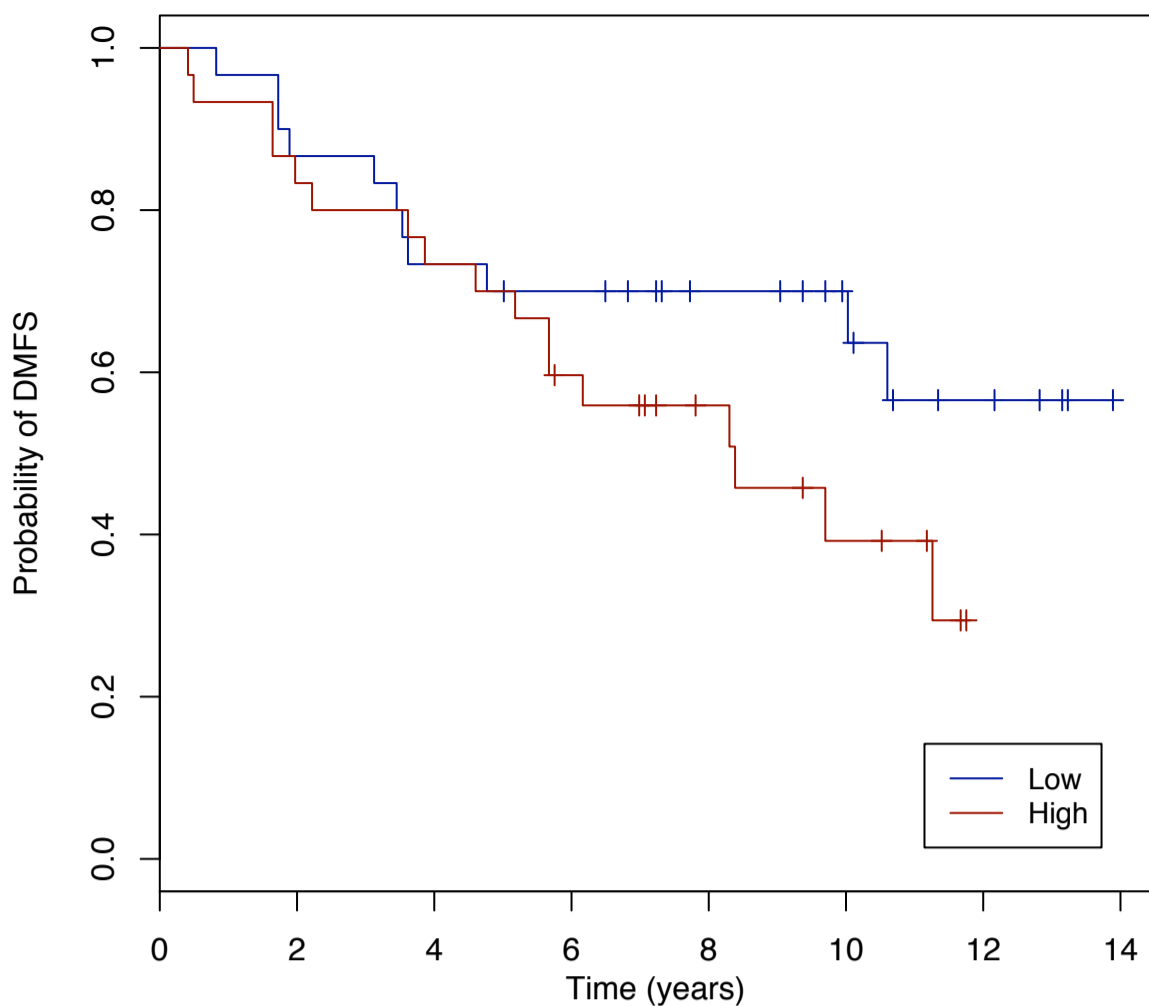

**No. At Risk**

|      |    |    |    |    |    |    |   |   |
|------|----|----|----|----|----|----|---|---|
| Low  | 30 | 27 | 23 | 21 | 16 | 12 | 7 | 2 |
| High | 30 | 26 | 23 | 17 | 12 | 7  | 1 | 1 |

**B**

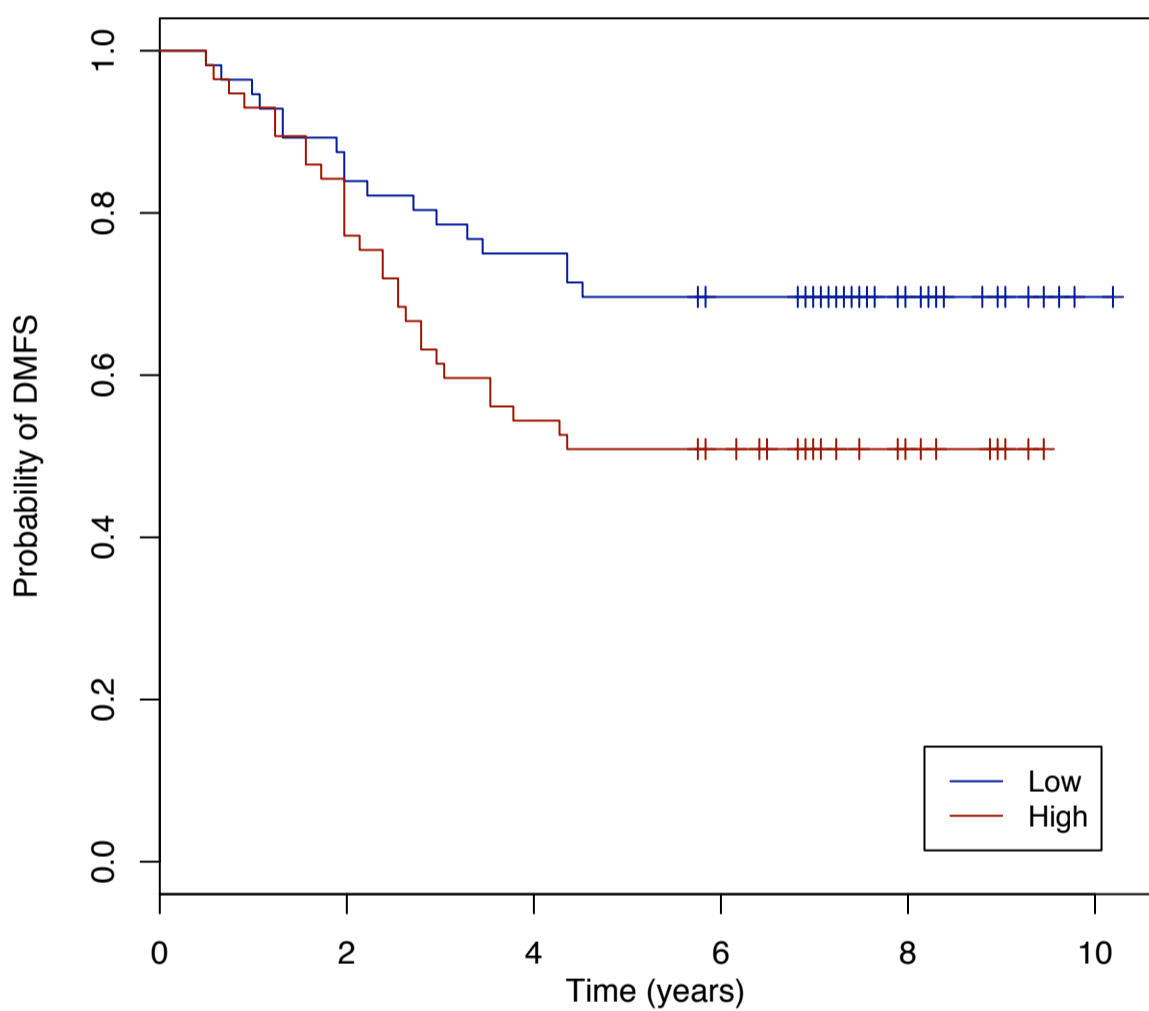

**No. At Risk**

|      |    |    |    |    |    |   |
|------|----|----|----|----|----|---|
| Low  | 56 | 49 | 43 | 38 | 16 | 2 |
| High | 57 | 48 | 32 | 28 | 13 | 1 |

**C**

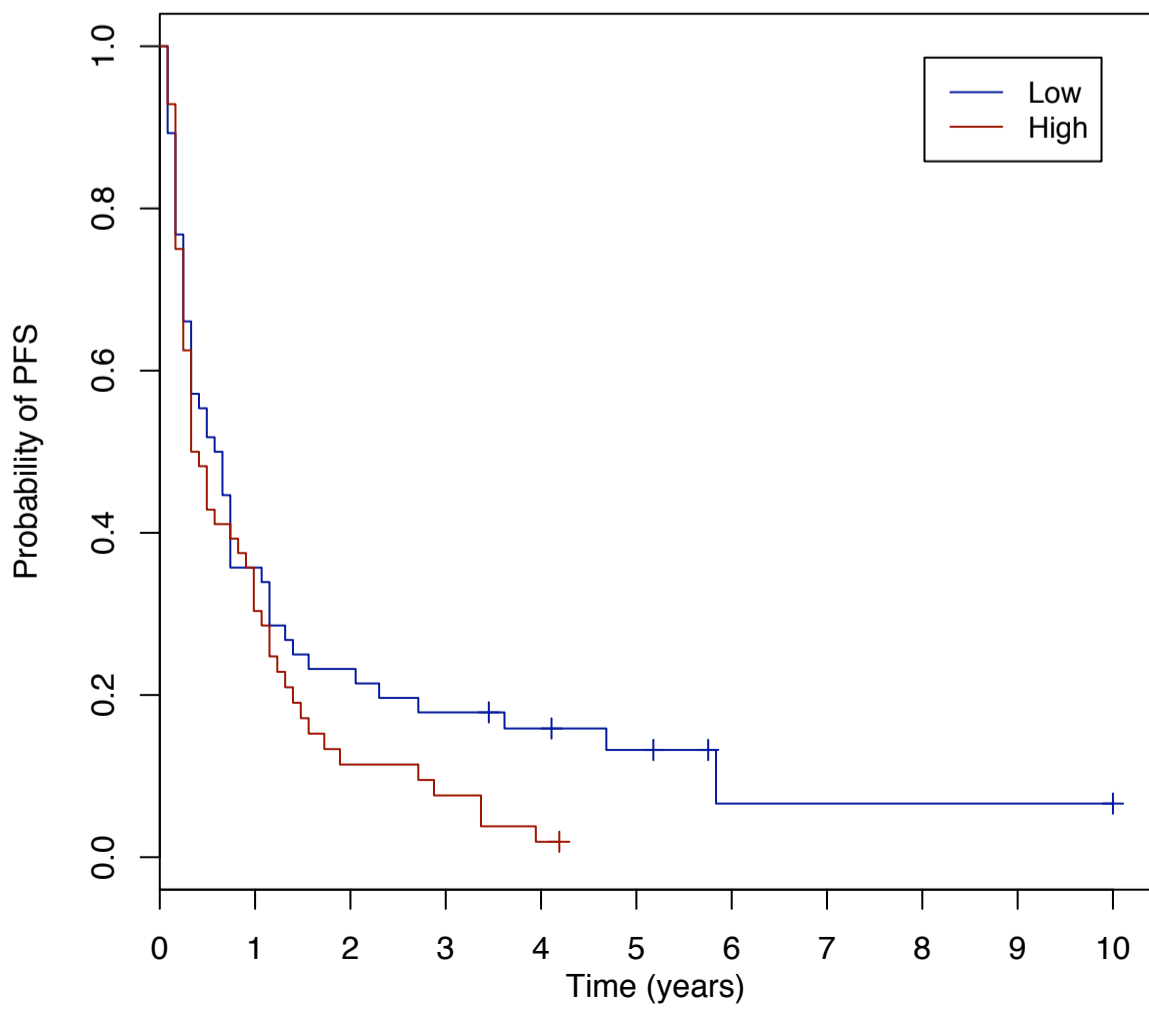

**No. At Risk**

|      |    |    |    |    |   |   |   |   |   |   |   |
|------|----|----|----|----|---|---|---|---|---|---|---|
| Low  | 56 | 25 | 14 | 11 | 9 | 6 | 2 | 2 | 2 | 2 | 1 |
| High | 56 | 20 | 7  | 5  | 2 | 1 | 1 | 1 | 1 | 1 | 1 |

Supplement: Additional file 6 [file 1471-2164-9-239-s6.pdf]
